# Supplementary material
Source: Springer Nature journal article supplement (https://www.springermedizin.de/resource/supplementary/13012_2010_295_MOESM2_ESM.pdf/9629656)

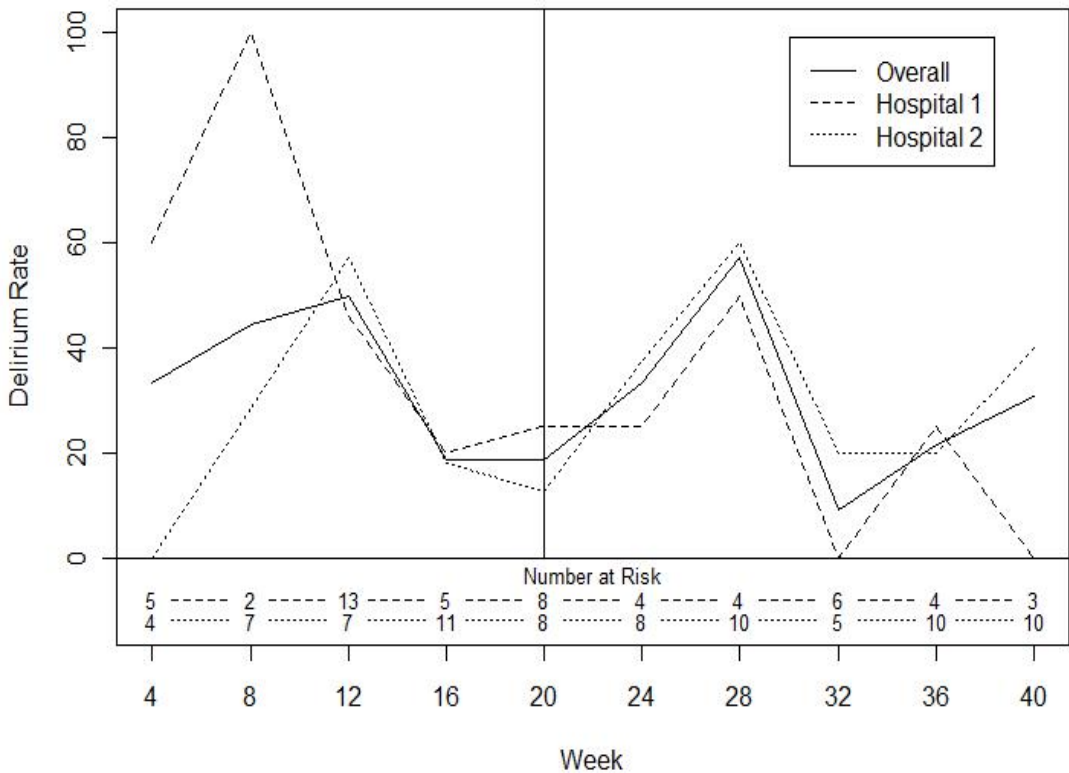

Supplement: MOESM2 [file 9629656]
